# Supplementary material for: Evaluation of stratospheric age-of-air from CF 4 , C 2 F 6 , C 3 F 8 , CHF 3 , HFC-125, HFC-227ea and SF 6 ; implications for the calculations of halocarbon lifetimes, fractional release factors and ozone depletion potentials
Source: Copernicus journal article supplement (doi:10.5194/acp-2017-748), 2017-09-13
Supplement: Supplementary file 2 [file acp-2017-748-supplement.zip]

Archive with 3 entries (2 files):
- acp-2017-748-supplement/
- acp-2017-748-supplement/acp-2017-748-supplement.pdf
- acp-2017-748-supplement/UEA_capegrim_timeseries_acp2017748.txt
