# Supplementary material for: Evaluation of stratospheric age-of-air from CF 4 , C 2 F 6 , C 3 F 8 , CHF 3 , HFC-125, HFC-227ea and SF 6 ; implications for the calculations of halocarbon lifetimes, fractional release factors and ozone depletion potentials
Source: Copernicus journal article supplement (doi:10.5194/acp-2017-748), 2017-09-13
Supplement: Supplementary file 2 [file acp-2017-748-supplement.zip › acp-2017-748-supplement/UEA_capegrim_timeseries_acp2017748.txt]

18	1001
Johannes	Laube
University	of	East	Anglia
contact:	j.laube@uea.ac.uk
merged	UEA	Cape	Grim	flask	analysis	archive
1	1
1978	4	26	2017	8	4
-----------	--------------	---------	---------	--
Time	is	given	in	years
all	compound_ppt	and	compount_err	values	/	ppt
missing	values	shown	by	999999
All	mixing	ratios	given	in	this	data	file	based	on	UEA	scale	as	of	07/07/2015
-----------	--------------	---------	---------	--
Atmospheric	Measurements	of	trace	gases	from	UEA,	flasks	collected	by	CSIRO
Flasks	collected	at	Cape	Grim	station
measured	by	gas	chromatography	with	mass	spectrometry	detection	(AutoSpec).
-----------	--------------	---------	---------	--
time	C2F6_ppt	C2F6_err	C3F8_ppt	C3F8_err	CHF3_ppt	CHF3_err	HFC227ea_ppt	HFC227ea_err	HFC125_ppt	HFC125_err	SF6_ppt	SF6_err
1978.321	0.788	0.045	3.211	0.19	0.018	0.011	0.035	0.002	0.556	0.007	99999	99999
1978.519	0.783	0.045	0.024	0.002	2.896	0.078	0.023	0.011	0.035	0.003	0.568	0.003
1978.832	0.781	0.017	3.107	0.078	99999	99999	99999	99999	99999	99999	99999	99999
1979.1	0.79	0.017	3.477	0.339	0.023	0.002	0.632	0.003	99999	99999	99999	99999
1979.122	3.155	0.019	99999	99999	99999	99999	99999	99999	99999	99999	99999	99999
1980.655	0.925	0.018	99999	99999	99999	99999	99999	99999	99999	99999	99999	99999
1980.738	0.034	0.002	4.455	0.302	0.756	0.003	99999	99999	99999	99999	99999	99999
1982.146	1.044	0.018	4.537	0.289	99999	99999	99999	99999	99999	99999	99999	99999
1982.405	1.082	0.044	4.958	0.067	99999	99999	99999	99999	99999	99999	99999	99999
1983.586	1.163	0.044	0.047	0	4.642	0.067	0.023	0.011	0.047	0.003	1.102	0.007
1985.605	1.298	0.018	0.06	0	5.58	0.219	0.053	0.003	1.368	0.003	99999	99999
1986.1	1.34	0.005	5.766	0.318	99999	99999	99999	99999	99999	99999	99999	99999
1986.866	1.418	0.01	6.274	0.318	99999	99999	99999	99999	99999	99999	99999	99999
1987.022	1.453	0.027	7.053	0.027	99999	99999	99999	99999	99999	99999	99999	99999
1987.025	1.414	0.027	0.073	0.001	6.274	0.06	1.603	0.004	99999	99999	99999	99999
1987.41	1.422	0.028	0.074	0.001	6.372	0.135	0.025	0.011	0.043	0.003	1.685	0.003
1988.474	1.585	0.053	6.746	0.102	1.86	0.007	99999	99999	99999	99999	99999	99999
1989.305	1.562	0.059	0.085	0.003	7.181	0.125	0.023	0.011	0.075	0.003	2.012	0.003
1990.402	8.073	0.125	99999	99999	99999	99999	99999	99999	99999	99999	99999	99999
1990.966	1.718	0.002	0.1	0.003	8.417	0.283	2.348	0.002	99999	99999	99999	99999
1991.202	1.735	0.005	0.097	0.003	8.201	0.076	0.027	0.011	0.043	0.003	2.323	0.003
1991.469	1.79	0.016	8.667	0.076	99999	99999	99999	99999	99999	99999	99999	99999
1991.511	1.781	0.011	8.87	0.077	99999	99999	99999	99999	99999	99999	99999	99999
1992.044	1.834	0.037	8.696	0.242	99999	99999	99999	99999	99999	99999	99999	99999
1992.116	1.839	0.034	9.076	0.242	99999	99999	99999	99999	99999	99999	99999	99999
1992.272	1.825	0.034	9.111	0.242	2.577	0.007	99999	99999	99999	99999	99999	99999
1992.505	1.838	0.036	9.142	0.243	99999	99999	99999	99999	99999	99999	99999	99999
1992.73	1.896	0.035	9.322	0.243	99999	99999	99999	99999	99999	99999	99999	99999
1992.732	1.875	0.038	9.306	0.086	99999	99999	99999	99999	99999	99999	99999	99999
1993.436	1.925	0.034	0.114	0.003	9.517	0.085	0.033	0.011	0.062	0.003	2.785	0.003
1993.496	1.942	0.034	9.885	0.326	0.037	0.011	0.066	0.002	99999	99999	99999	99999
1993.613	1.918	0.034	9.555	0.326	99999	99999	99999	99999	99999	99999	99999	99999
1993.721	1.959	0.034	9.7	0.144	99999	99999	99999	99999	99999	99999	99999	99999
1994.113	2.002	0.034	10.03	0.144	0.083	0.012	2.942	0.018	99999	99999	99999	99999
1994.208	2.094	0.045	9.718	0.144	99999	99999	99999	99999	99999	99999	99999	99999
1994.324	1.987	0.046	10.039	0.144	99999	99999	99999	99999	99999	99999	99999	99999
1994.419	2.006	0.047	10.158	0.144	99999	99999	99999	99999	99999	99999	99999	99999
1994.441	2.035	0.047	9.874	0.144	99999	99999	99999	99999	99999	99999	99999	99999
1994.764	10.233	0.144	99999	99999	99999	99999	99999	99999	99999	99999	99999	99999
1994.936	2.003	0.047	10.432	0.13	99999	99999	99999	99999	99999	99999	99999	99999
1995.105	2.063	0.055	10.382	0.13	99999	99999	99999	99999	99999	99999	99999	99999
1995.202	2.095	0.059	10.834	0.13	99999	99999	99999	99999	99999	99999	99999	99999
1995.283	2.075	0.055	10.443	0.13	99999	99999	99999	99999	99999	99999	99999	99999
1995.452	2.046	0.056	0.139	0.006	11.049	0.151	0.042	0.011	0.131	0.003	3.297	0.004
1995.646	2.218	0.046	99999	99999	99999	99999	99999	99999	99999	99999	99999	99999
1995.896	2.178	0.046	11.105	0.151	99999	99999	99999	99999	99999	99999	99999	99999
1996.108	2.122	0.017	11.458	0.151	99999	99999	99999	99999	99999	99999	99999	99999
1996.261	2.144	0.02	11.569	0.097	99999	99999	99999	99999	99999	99999	99999	99999
1996.41	2.213	0.014	11.468	0.097	3.474	0.007	99999	99999	99999	99999	99999	99999
1996.641	2.213	0.015	11.996	0.097	99999	99999	99999	99999	99999	99999	99999	99999
1996.888	2.201	0.016	11.955	0.101	99999	99999	99999	99999	99999	99999	99999	99999
1997.019	2.197	0.017	0.152	0.006	12.162	0.101	0.048	0.011	0.294	0.005	3.608	0.006
1997.155	2.184	0.022	12.145	0.101	99999	99999	99999	99999	99999	99999	99999	99999
1997.416	2.274	0.029	12.479	0.101	99999	99999	99999	99999	99999	99999	99999	99999
1997.541	2.256	0.02	12.672	0.101	99999	99999	99999	99999	99999	99999	99999	99999
1998.18	2.334	0.024	13.008	0.105	99999	99999	99999	99999	99999	99999	99999	99999
1998.291	13.341	0.101	0.066	0.011	0.536	0.002	99999	99999	99999	99999	99999	99999
1998.388	2.374	0.019	99999	99999	99999	99999	99999	99999	99999	99999	99999	99999
1998.461	2.4	0.028	99999	99999	99999	99999	99999	99999	99999	99999	99999	99999
1998.663	2.378	0.045	99999	99999	99999	99999	99999	99999	99999	99999	99999	99999
1998.732	2.41	0.018	99999	99999	99999	99999	99999	99999	99999	99999	99999	99999
1998.791	2.394	0.019	14.073	0.116	99999	99999	99999	99999	99999	99999	99999	99999
1998.907	2.394	0.025	99999	99999	99999	99999	99999	99999	99999	99999	99999	99999
1999.13	2.435	0.028	14.231	0.119	99999	99999	99999	99999	99999	99999	99999	99999
1999.178	2.433	0.022	14.522	0.116	99999	99999	99999	99999	99999	99999	99999	99999
1999.286	2.495	0.019	14.215	0.116	99999	99999	99999	99999	99999	99999	99999	99999
1999.369	2.485	0.028	14.684	0.167	4.182	0.007	99999	99999	99999	99999	99999	99999
1999.474	2.494	0.018	0.209	0.006	14.49	0.118	0.085	0.011	0.958	0.005	4.209	0.006
1999.627	2.486	0.019	14.748	0.119	99999	99999	99999	99999	99999	99999	99999	99999
1999.732	2.475	0.033	15.205	0.117	99999	99999	99999	99999	99999	99999	99999	99999
1999.799	2.502	0.021	14.669	0.116	99999	99999	99999	99999	99999	99999	99999	99999
1999.874	2.5	0.026	15.137	0.117	99999	99999	99999	99999	99999	99999	99999	99999
1999.963	2.491	0.026	14.823	0.716	99999	99999	99999	99999	99999	99999	99999	99999
2000.055	2.471	0.026	14.699	0.716	99999	99999	99999	99999	99999	99999	99999	99999
2000.146	2.55	0.028	0.227	0.01	14.674	0.717	0.12	0.003	4.371	0.006	99999	99999
2000.746	14.985	0.731	0.103	0.027	1.185	0.012	4.403	0.018	99999	99999	99999	99999
2001.324	2.69	0.026	0.262	0.01	16.185	0.716	1.506	0.005	4.601	0.003	99999	99999
2001.458	2.733	0.029	16.141	0.222	99999	99999	99999	99999	99999	99999	99999	99999
2001.541	2.733	0.048	16.474	0.222	4.687	0.007	99999	99999	99999	99999	99999	99999
2001.605	2.718	0.049	16.871	0.232	99999	99999	99999	99999	99999	99999	99999	99999
2001.678	2.702	0.048	16.116	0.223	99999	99999	99999	99999	99999	99999	99999	99999
2001.799	2.729	0.057	16.446	0.222	99999	99999	99999	99999	99999	99999	99999	99999
2001.869	2.726	0.049	16.807	0.222	99999	99999	99999	99999	99999	99999	99999	99999
2001.947	2.722	0.058	0.28	0.01	16.613	0.222	4.729	0.006	99999	99999	99999	99999
2002.471	16.457	0.29	0.149	0.027	1.808	0.012	4.824	0.018	99999	99999	99999	99999
2003.058	2.842	0.125	17.196	0.245	99999	99999	99999	99999	99999	99999	99999	99999
2003.202	2.831	0.058	17.506	0.244	99999	99999	99999	99999	99999	99999	99999	99999
2003.291	2.868	0.08	17.201	0.243	99999	99999	99999	99999	99999	99999	99999	99999
2003.391	2.868	0.058	0.331	0.005	17.365	0.4	0.178	0.012	2.268	0.005	5.053	0.006
2003.716	2.952	0.007	17.654	0.049	5.17	0.007	99999	99999	99999	99999	99999	99999
2003.772	2.969	0.007	17.784	0.05	99999	99999	99999	99999	99999	99999	99999	99999
2003.952	2.912	0.09	17.524	0.683	99999	99999	99999	99999	99999	99999	99999	99999
2004.041	2.886	0.025	18.178	0.683	99999	99999	99999	99999	99999	99999	99999	99999
2004.385	2.98	0.133	18.258	0.684	99999	99999	99999	99999	99999	99999	99999	99999
2004.499	2.969	0.025	0.371	0.003	18.276	0.517	0.244	0.003	5.275	0.006	99999	99999
2004.6	3.014	0.116	18.728	0.134	99999	99999	99999	99999	99999	99999	99999	99999
2004.669	3.057	0.098	18.103	0.105	0.251	0.027	2.91	0.012	5.326	0.018	99999	99999
2004.961	0.377	0.004	0.261	0.003	5.477	0.006	99999	99999	99999	99999	99999	99999
2005.047	3.111	0.026	0.387	0.007	19.682	0.398	5.463	0.002	99999	99999	99999	99999
2005.111	0.394	0.004	18.276	0.011	0.252	0.012	3.137	0.001	5.421	0.003	99999	99999
2005.266	3.091	0.026	0.381	0.007	18.959	0.823	0.253	0.011	3.251	0.005	5.447	0.003
2005.758	0.397	0.005	0.28	0.003	5.596	0.006	99999	99999	99999	99999	99999	99999
2005.93	3.121	0.036	19.668	0.816	5.571	0.009	99999	99999	99999	99999	99999	99999
2006.111	3.11	0.036	19.427	0.798	5.564	0.009	99999	99999	99999	99999	99999	99999
2006.138	3.151	0.021	0.414	0.006	19.523	0.397	5.635	0.004	99999	99999	99999	99999
2006.646	3.244	0.024	19.888	0.292	0.339	0.027	4.13	0.012	5.722	0.018	99999	99999
2006.947	3.227	0.023	0.43	0.006	20.908	0.416	5.829	0.004	99999	99999	99999	99999
2007.471	3.284	0.021	20.906	0.142	6.009	0.003	99999	99999	99999	99999	99999	99999
2007.514	0.449	0.006	20.671	0.151	0.36	0.012	4.91	0.005	5.966	0.003	99999	99999
2007.721	3.338	0.018	0.457	0.007	21.672	0.446	6.084	0.002	99999	99999	99999	99999
2008.452	3.353	0.024	0.469	0.006	21.915	0.386	0.454	0.027	5.713	0.012	6.215	0.018
2009.183	3.424	0.026	0.484	0.003	22.742	0.534	6.424	0.005	6.482	0.007	99999	99999
2009.574	0.493	0.003	22.857	0.083	0.491	0.024	6.829	0.005	6.584	0.004	99999	99999
2010.944	3.565	0.025	0.517	0.003	24.084	0.256	8.457	0.005	6.998	0.004	99999	99999
2011.105	8.982	0.02	99999	99999	99999	99999	99999	99999	99999	99999	99999	99999
2011.213	8.958	0.02	7.021	0.018	99999	99999	99999	99999	99999	99999	99999	99999
2011.305	9.428	0.02	99999	99999	99999	99999	99999	99999	99999	99999	99999	99999
2011.405	3.582	0.05	9.606	0.02	7.124	0.007	99999	99999	99999	99999	99999	99999
2011.474	3.618	0.012	9.521	0.02	7.176	0.018	99999	99999	99999	99999	99999	99999
2012.324	3.664	0.022	0.548	0.007	25.748	0.476	10.622	0.001	7.416	0.004	99999	99999
2012.666	99999	99999	0.548	0.007	25.555	0.408	11.073	0.001	7.457	0.003	99999	99999
2012.928	3.715	0.023	0.557	0.007	26.384	0.786	11.507	0.001	7.565	0.003	99999	99999
2013.205	3.702	0.037	26.678	0.234	0.759	0.032	12.09	0.01	7.682	0.009	99999	99999
2013.514	3.727	0.032	26.59	0.258	0.805	0.032	12.757	0.01	7.772	0.009	99999	99999
2013.788	3.749	0.032	26.893	0.22	0.822	0.032	13.217	0.01	7.889	0.001	99999	99999
2014.141	3.743	0.032	27.236	0.221	0.834	0.032	13.688	0.01	7.905	0.001	99999	99999
2014.347	3.775	0.034	27.578	0.243	8.005	0.009	99999	99999	99999	99999	99999	99999
2014.547	3.761	0.062	27.831	0.307	7.99	0.009	99999	99999	99999	99999	99999	99999
2014.697	3.791	0.053	27.98	0.248	8.128	0.009	99999	99999	99999	99999	99999	99999
2014.861	3.778	0.031	28.077	0.384	8.115	0.009	99999	99999	99999	99999	99999	99999
